# Supplementary material for: Hollow and mesoporous aluminosilica-encapsulated Pt-CoOx for the selective hydrogenation of substituted nitroaromatics
Source: Royal Society of Chemistry journal article supplement (doi:10.1039/d1cc02777h), 2021-01-01

## COMMUNICATION

# Hollow and mesoporous aluminosilica encapsulated Pt-CoO<sub>x</sub> for selective hydrogenation of substituted nitroaromatics

Received 00th January 20xx,  
Accepted 00th January 20xx

Hongbo Yu,<sup>a,\*</sup> Chunzheng Wu,<sup>b</sup> Xuemin Yuan,<sup>a</sup> Fan Yang,<sup>a</sup> Zhang Fei,<sup>a</sup> and Hongfeng Yin<sup>a,\*</sup>

DOI: 10.1039/x0xx00000x

### Experimental

<sup>a</sup> Ningbo Institute of Materials Technology and Engineering, Chinese Academy of Sciences, 1219 Zhongguan West Road, Ningbo, Zhejiang 315201, P. R. 11219 Zhongguan West Road, Ningbo, Zhejiang 315201, P. R.

<sup>b</sup> College of Sciences, Zhejiang A&F University, Hangzhou, Zhejiang 311300, P.R. China.

<sup>c</sup> E-mail: yuhongbo@nimte.ac.cn; yinhf@nimte.ac.cn

Electronic Supplementary Information (ESI) available: [details of any supplementary information available should be included here]. See DOI: 10.1039/x0xx00000x

## Materials

$K_2PtCl_4$  (98%),  $CoCl_2 \cdot 6H_2O$ , Brij® L4, 1-octane, Tetraethyl silicate (TEOS),  $Na_2CO_3$ ,  $NaAlO_2$ , Hexadecyl trimethyl ammonium bromide (CTAB),  $NaBH_4$ , *o*-chloronitrobenzene (*o*-CNB), *m*-chloronitrobenzene (*m*-CNB), *p*-chloronitrobenzene (*p*-CNB), *p*-bromonitrobenzene (*p*-BNB), *m*-nitroacetophenone (*m*-NAP), *p*-nitrobenzaldehyde (*p*-NBA), *p*-nitrotoluene (*p*-NT), and *o*-nitrophenol (*o*-NP) were obtained from Aladdin Reagents Co., Ltd. (China). Anhydrous ethanol, acetone, and ammonium hydroxide ( $NH_3 \cdot H_2O$ , 25-28%) were purchased from Sinopharm Chemical Reagents Co., Ltd. (China). Deionized water was used throughout. All reagents were used directly without further purification.

## Synthesis of Pt-CoO<sub>x</sub>@HMANS and Pt@HMANS.

In a typical procedure, 5.66 g of Brij® L4 was fully dissolved in 45 ml of 1-octane in a 250 mL three-necked round-bottomed flask at 50 °C under magnetic stirring (300 r/min). Then, 1.5 ml of aqueous solution containing 0.048 mmol  $K_2PtCl_4$  and 0.048 mmol  $CoCl_2 \cdot 6H_2O$  were added in the above transparent microemulsion. The resultant mixture was stirred for 30 min, followed by injecting 0.5 ml of ammonia aqueous solution containing 0.05 g  $NaBH_4$ . After 60 min, 0.6 ml of ammonia aqueous solution and 2 ml of TEOS were successively added dropwise to the flask. After that, the system was maintained at 50 °C for 2 h. The PtCo@SiO<sub>2</sub> core-shell NPs were collected by centrifugation and washed with acetone twice.

Pt-based yolk-shell nanoreactors were synthesized by a modified selective etching method.<sup>1</sup> 50 mg of the as-synthesized PtCo@SiO<sub>2</sub> core-shell NPs were dispersed in 10 ml of deionized water by ultrasonication in 50 ml single neck flask. Then 0.0125 g of CTAB, 0.0265 g of  $NaAlO_2$ , and 0.205 g of  $Na_2CO_3$  were added to the flask in sequence. The system was heated to 95 °C with stirring for 3h. Upon cooling to room temperature, the resultant mixture was collected by centrifugation and washed with deionized water and ethanol. The products were further calcined at 550 °C for 6 h with at a rate of 1.5 °C/min in air to obtain the Pt-CoO<sub>x</sub>@HMANS.

The Pt@HMANS was prepared by the same procedure except that without the addition of Co precursor.

## Characterization

X-ray diffractions (XRD) patterns were obtained using Bruker D8 Advance X-ray diffractometer with Cu K $\alpha$  radiation. Transmission electron microscopy (TEM) images with energy-dispersive spectroscopy (EDS) were tested by the Talos F200x instrument. The BET surface area and pore size distributions of the nanoreactors were obtained on the Micromeritics ASAP-2020 Mautomatic specific surface area and porous physical adsorption analyzer. X-ray photoelectron spectroscopy (XPS) spectra of the samples were conducted on an AXIS ULTRADLD multifunctional X-ray photoelectron spectroscope with an Al source. The results were corrected by C 1s (284.8 eV), and its curve fitting was performed using the Casa XPS software. The diffuse reflectance Fourier transform infrared spectra (DRIFT-IR) with CO probes of Pt-CoO<sub>x</sub>@HMANS and Pt@HMANS were obtained using a Nicolet-6700 Fourier transform infrared spectrometer. The samples were firstly pretreated by Ar purging at 100 °C for 1 h and then cooled down to room temperature. After that, the sample was exposed to pure CO at a gas flow rate of 20 mL/min for 30 min. Finally, the free CO was removed by Ar purging and the spectra were recorded.

## Activity test

The catalytic reduction of *o*-CNB, *m*-CNB, *p*-CNB, *p*-BNB, *m*-NAP, *p*-NBA, *p*-NT, and *o*-NP with H<sub>2</sub> were performed in a 100 ml of three-necked round-bottomed flask under mild reaction conditions (45 °C, 0.1 MPa H<sub>2</sub>). Briefly, 25 mg of nanocatalyst, 10 ml of absolute ethanol, and 0.5 mmol of various substituted nitroaromatics were mixed in the flask under a magnetic stirring (700 r/min). Then the system was heated to 45 °C under 0.1 MPa H<sub>2</sub> flow. After reaction, the hydrogenation products were analyzed by a gas chromatograph GC 2060 equipped with a flame ionization detector.

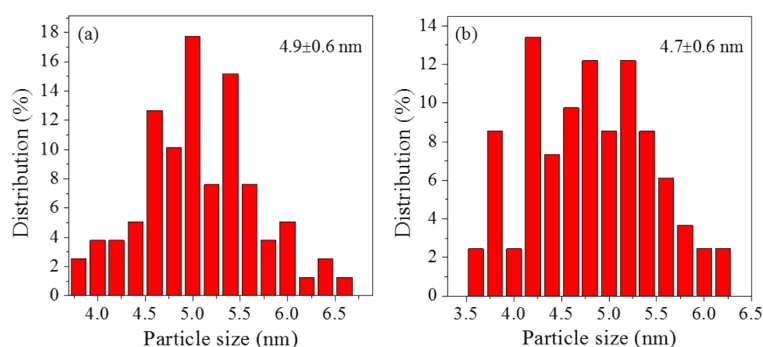

**Figure S1.** Size distributions of Pt NPs showing: (a) Pt@HMANS, (b) Pt-CoO<sub>x</sub>@HMANS.

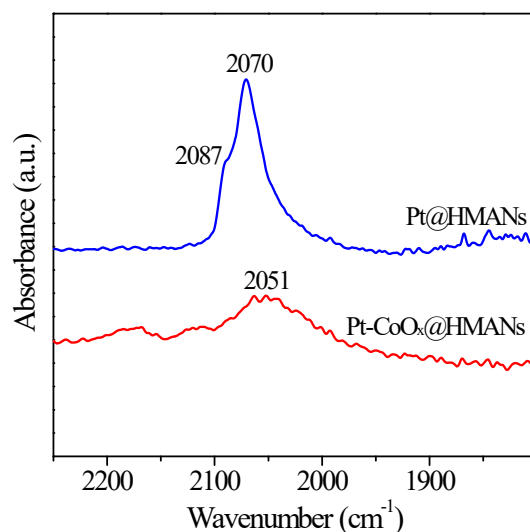

**Figure S2.** DRIFT-IR spectra with CO probes of Pt-CoO<sub>x</sub>@HMANS and Pt@HMANS.

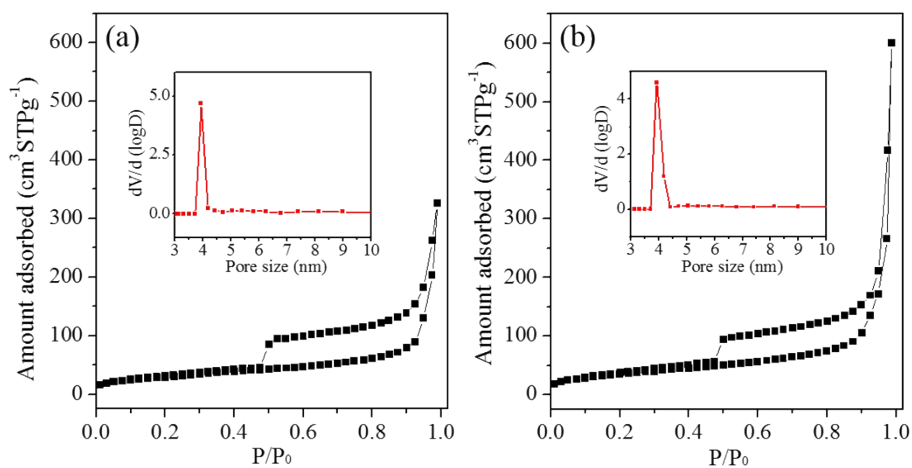

**Figure S3.** N<sub>2</sub> adsorption-desorption isotherms and pore size distribution curves (inset) showing: (a) Pt-CoO<sub>x</sub>@HMANS and (b) Pt@HMANS.

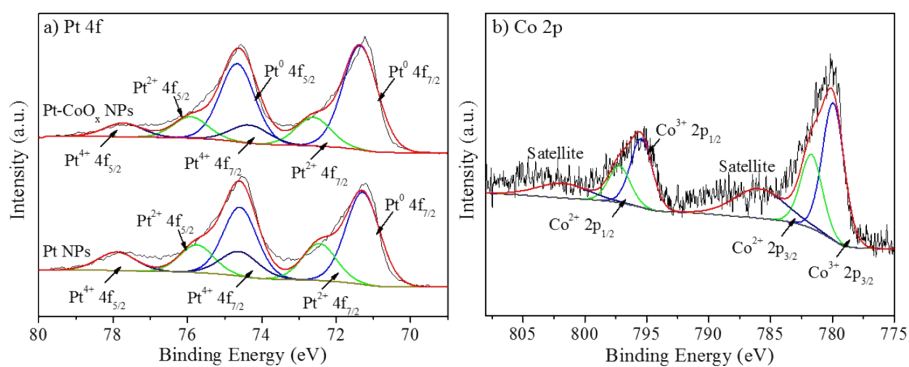

**Figure S4.** XPS spectra of a) Pt 4f and b) Co 2p.

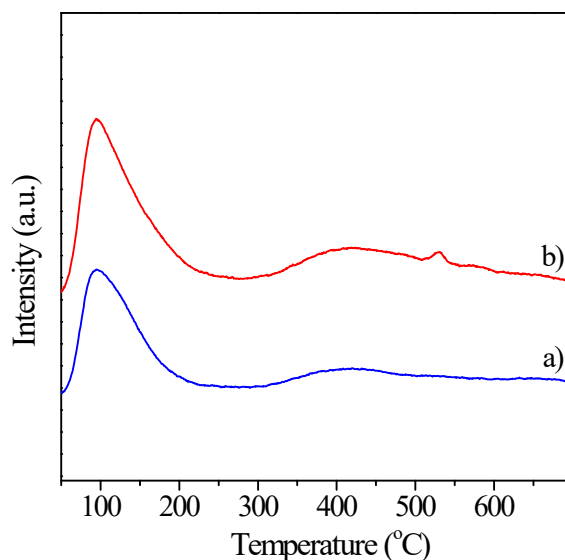

Figure S5.  $\text{NH}_3$ -TPD patterns of the a)  $\text{Pt-CoO}_x/\text{SiO}_2$  and b)  $\text{Pt-CoO}_x/\text{HMANs}$ .

Table S1. XPS Results of Pt NPs and  $\text{Pt-CoO}_x$  NPs.

| Samples               | Pt/Oxidized Pt | Pt/M (XPS) | Pt/M (ICP) |
|-----------------------|----------------|------------|------------|
| $\text{Pt-CoO}_x$ NPs | 58.8/41.2      | 44.7/55.3  | 46.7/53.3  |
| Pt NPs                | 68.3/31.7      | -          |            |

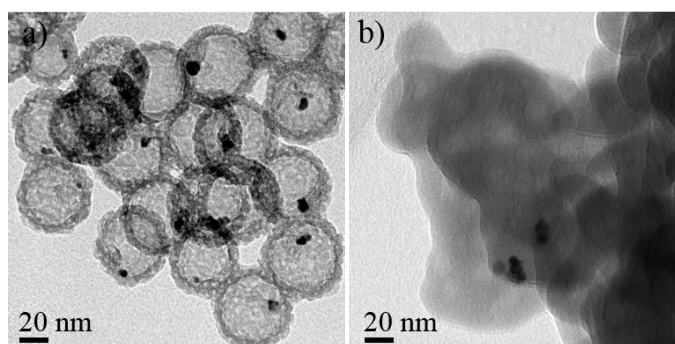

Figure S6. TEM images of a)  $\text{Pt-CoO}_x/\text{SiO}_2$  and b)  $\text{Pt-CoO}_x/\text{HMANs}$ .

The  $\text{Pt-CoO}_x/\text{SiO}_2$  was synthesized by the same procedure as the  $\text{Pt-CoO}_x/\text{HMANs}$  except that without the addition of  $\text{NaAlO}_2$  during the selective etching process.

Table S2. The catalytic hydrogenation performance of *p*-CNB over various catalysts.

| Catalysts <sup>a</sup>         | Conversion (%) | Selectivity (%) |        |
|--------------------------------|----------------|-----------------|--------|
|                                |                | <i>p</i> -CAN   | Others |
| $\text{Pt-CoO}_x/\text{HMANs}$ | 96.9           | 98.5            | 1.5    |
| $\text{Pt-CoO}_x/\text{SiO}_2$ | 89.6           | 98.8            | 1.2    |
| $\text{Pt-CoO}_x/\text{HMANs}$ | 78.1           | 68.6            | 31.4   |

<sup>a</sup>Reaction conditions: reactants-0.5 mmol; EtOH-10.0 mL;  $\text{H}_2$ -0.10 MPa; reaction temperature-45 °C; reaction time-1.5 h; speed of agitation-700 rpm. Catalysts-0.025 g.

**Table S3.** Comparison of catalytic performance of Pt-CoO<sub>x</sub>@HMANs and previously reported heterogeneous catalysts for the selective hydrogenation of *m*-CNB.

| Catalysts                             | Conditions |         |       | Conv. (%) | Sel. (%) | TON <sup>a</sup> /h | Ref.      |
|---------------------------------------|------------|---------|-------|-----------|----------|---------------------|-----------|
|                                       | T (°C)     | P (MPa) | t (h) |           |          |                     |           |
| Pt-CoO <sub>x</sub> @HMANs            | 45         | 0.1     | 1.5   | 94.7      | 99.4     | 105                 | This work |
| Pt/CMK-3-HQ                           | 80         | 2.0     | 1     | 100       | 100      | 12                  | 1         |
| PtZn/SiO <sub>2</sub>                 | 40         | 0.1     | 1     | 100       | 99       | 26                  | 2         |
| Ir-FeO <sub>x</sub> /SBA-15           | 45         | 0.1     | 2     | 97.8      | 100      | 49                  | 3         |
| IrNi/Al <sub>2</sub> O <sub>3</sub>   | 45         | 0.1     | 2     | 100       | 92       | 31                  | 4         |
| Ir-CoO <sub>x</sub> @SiO <sub>2</sub> | 45         | 0.1     | 2     | 96.7      | 95.5     | 25                  | 5         |
| Ir/CNT                                | 25         | 2.0     | 5     | 100       | 100      | 31                  | 6         |
| Ir nanowires                          | 40         | 0.3     | 0.6   | 93.3      | 99       | 15                  | 7         |

<sup>a</sup> Turnover number (TON) is measured as moles of products per total molar metal atoms.

#### Reference

- 1 Y. Sheng, X. Wang, Z. Xing, X. Chen, X. Zou, X. Lu, *ACS Sustainable Chem. Eng.*, 2019, **7**, 8908-8916
- 2 S. Iihama, S. Furukawa, T. Komatsu, *ACS Catal.*, 2016, **6**, 742-746.
- 3 H. Yu, C. Wu, S. Wang, T. Li, H. Yin, *ACS Appl. Nano Mater.*, DOI: 10.1021/acsanm.1c01164.
- 4 H. Yu, W. Tang, K. Li, S. Zhao, H. Yin, S. Zhou, *ACS Appl. Mater. Interfaces*, 2019, **11**, 6958-6969.
- 5 S. Wang, C. Wu, H. Yu, T. Li, X. Yan, B. Yan, H. Yin, *ACS Appl. Mater. Interfaces*, 2020, **12**, 9966-9976.
- 6 A. B. Dongil, C. Rivera-Cárcamo, L. Pastor-Pérez, A. Sepúlveda-Escribano, P. Reyes, *Catal. Today*, 2015, **249**, 72-78.
- 7 T. Lu, H. Wei, X. Yang, J. Li, X. Wang, T. Zhang, *Langmuir*, 2015, **31**, 90-95.

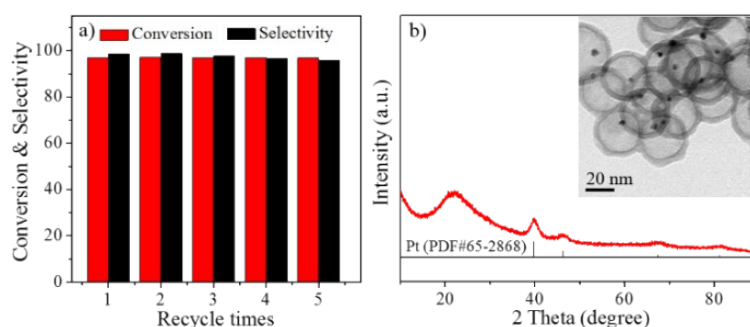

**Figure S7.** a) Recycle performance of Pt-CoO<sub>x</sub>@HMANs for the selective hydrogenation of *p*-CNB; b) XRD pattern and TEM image (inset) of Pt-CoO<sub>x</sub>@HMANs after five successive reactions.

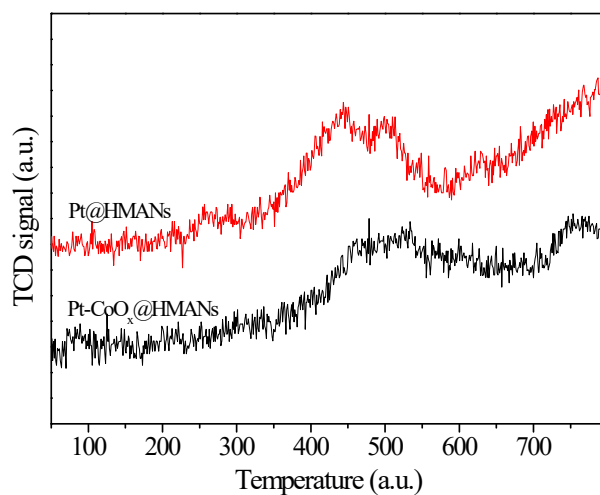

Figure S8. H<sub>2</sub>-TPD profiles of Pt@HMANS and Pt-CoO<sub>x</sub>@HMANS.

## Characterization of the main product for hydrogenation of various substituted nitroaromatics by GC-MS (Agilent 7890B-5977A).

1, identification of the desired product for hydrogenation of *o*-CNB

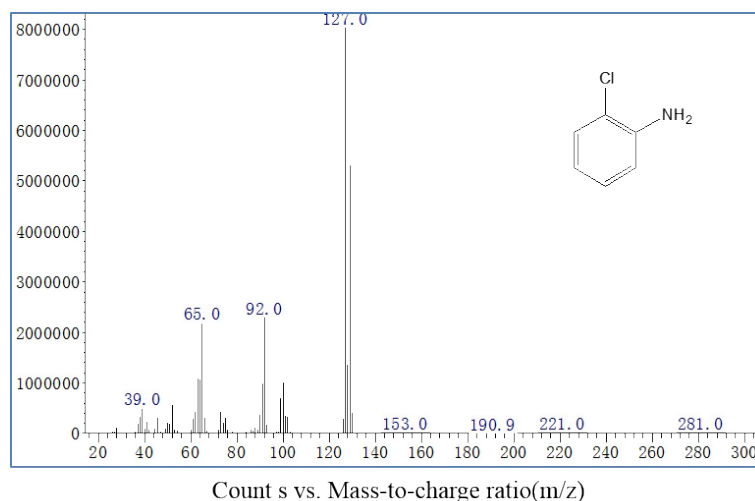

2, identification of the desired product for hydrogenation of *m*-CNB

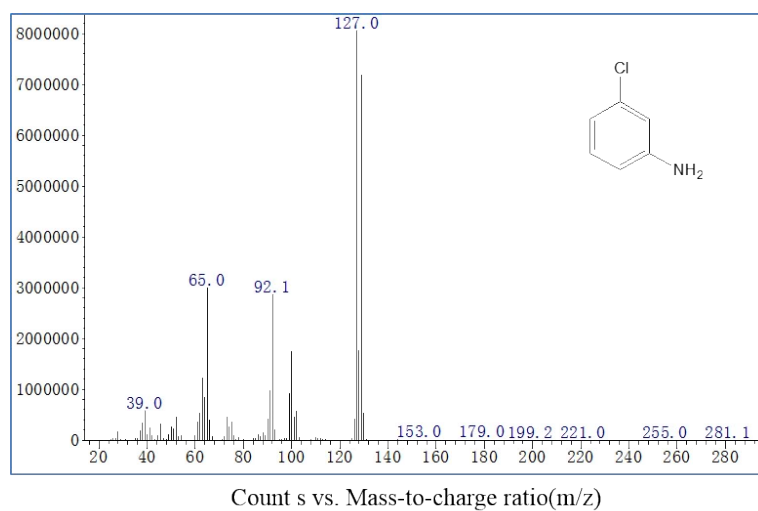

### 3, identification of the desired product for hydrogenation of *p*-CNB

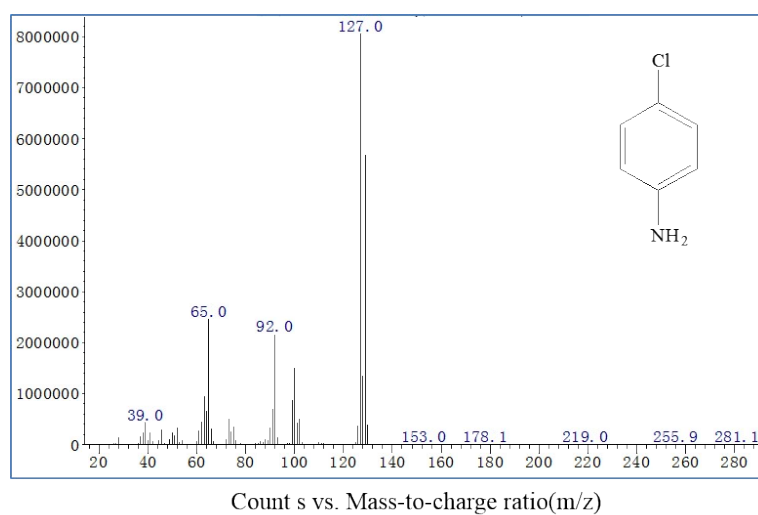

### 4, identification of the desired product for hydrogenation of *p*-BNB

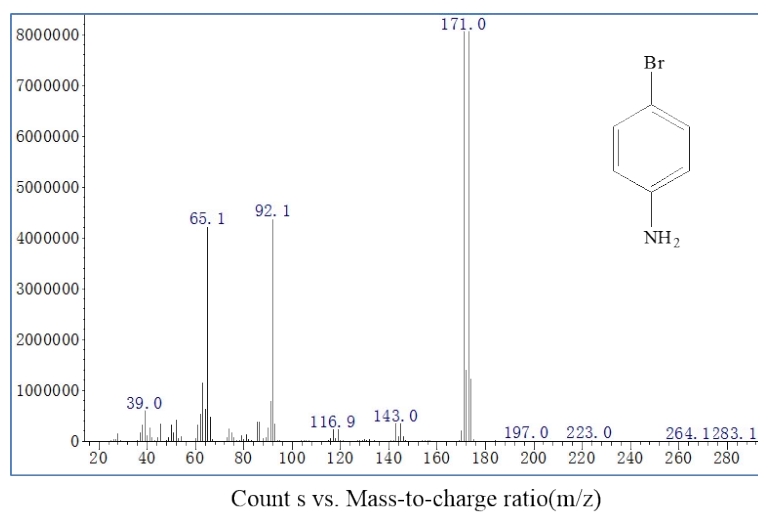

5, identification of the desired product for hydrogenation of *p*-NBA

a) Characterization of the main product for hydrogenation of *p*-nitrobenzaldehyde by GC-MS. Note: there is no MS reference data in GC-MS for this product (*p*-aminobenzaldehyde), and we ascribe the signals at 121 and 120 to the species shown in the following Figure.

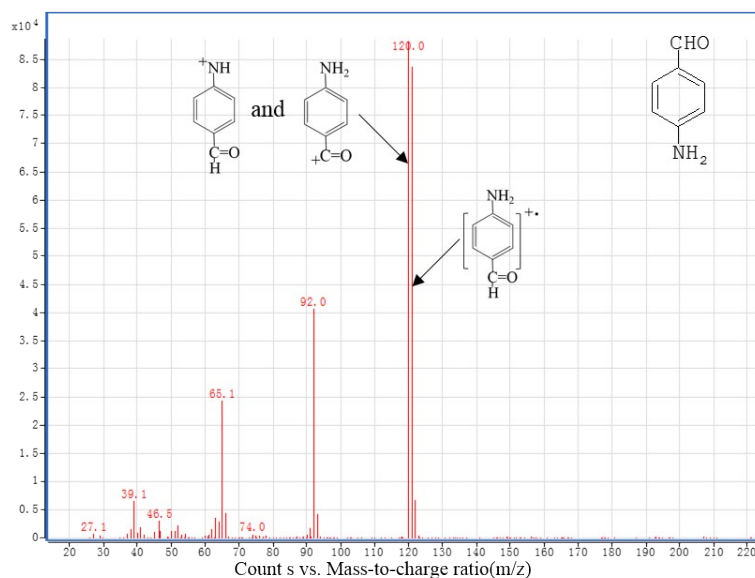6, identification of the desired product for hydrogenation of *m*-NAP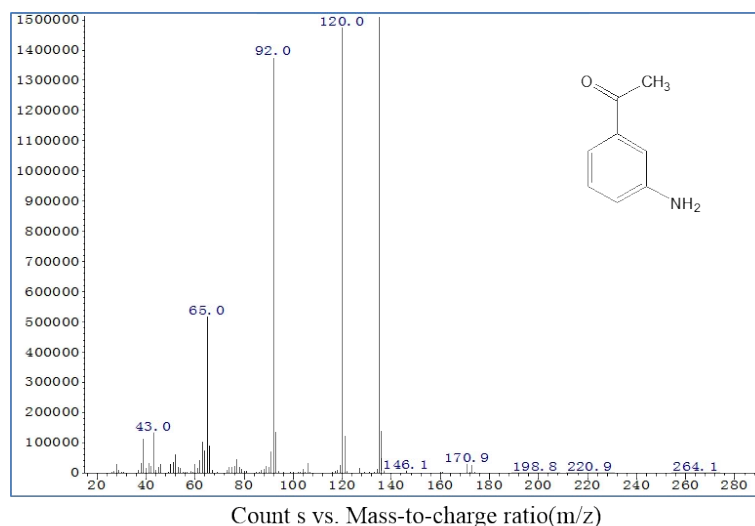7, identification of the desired product for hydrogenation of *o*-NP



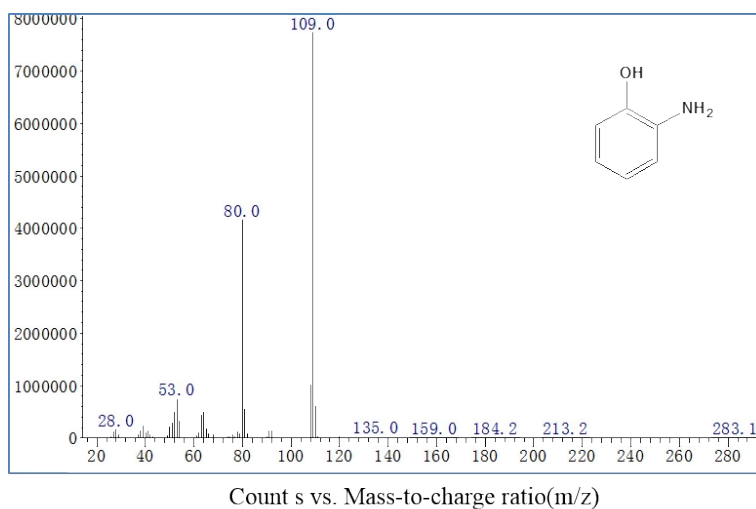

8, identification of the desired product for hydrogenation of *p*-NT

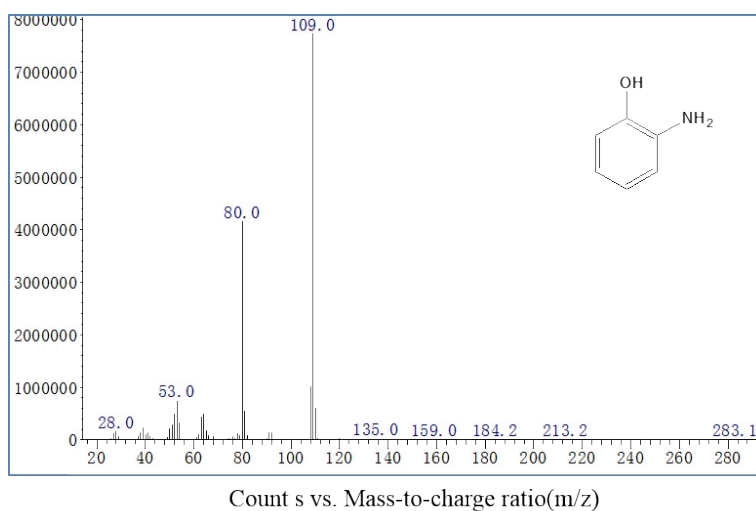

Supplement: d1cc02777h1.pdf [file d1cc02777h1.pdf]
